# Supplementary material
Source: PubMed Central journal article supplement (PMC6359973)

## **Supplementary Figures**

### **Supplementary Figure 1. ASS1 expression is downregulated in hypoxic and acidic states**

(A) Intracellular lactate measurements using GC/MS of fibroblasts taken by biopsies from a CTLN I patient as compared to normal human dermal fibroblasts (NHDF). The experiment was repeated twice, in triplicates. (B) Extracellular pH (pHe) measurements of control U2OS osteosarcoma cells infected with empty vector during a 72 hours of incubation in  $-\text{CO}_2/-\text{HCO}_3^-$  conditions. As a control, we incubated under the same conditions a cell free medium. (C) A western blot quantification correlating with Figure 1F showing ASS1 protein levels extracted from osteosarcoma cancer cells ( $\text{pHe} \leq 6.6$ ), following incubation with or without bicarbonate in the medium and  $\text{CO}_2$  in the incubator. ( $-\text{CO}_2/-\text{HCO}_3^-$  [ $\text{pHe} \leq 6.6$ ] or  $+\text{CO}_2/+\text{HCO}_3^-$  [ $\text{pHe} 7.4$ ] conditions). ASS1 levels are normalized to the expression levels of GAPDH. (D) **Left:** Representative normalized mRNA expression levels of osteosarcoma cells following 24 hours incubation under either pHe 7.4 or pHe 6.3 using 25mM PIPES. ASS1 levels are normalized to HPRT. **Right:** A quantification of a western blot correlating with Figure 1G showing ASS1 protein levels extracted from osteosarcoma cells following 24 hours incubation under either pHe 7.4 or pHe 6.3 conditions using 25mM PIPES. ASS1 levels are normalized to the expression levels of  $\alpha$ -tubulin.

We used student's t-test (2-tail) for statistical analysis. Unless otherwise specified, each graph represents the average of  $n \geq 3$  experiments  $\pm$  S.D. \*,  $P \leq 0.05$ .

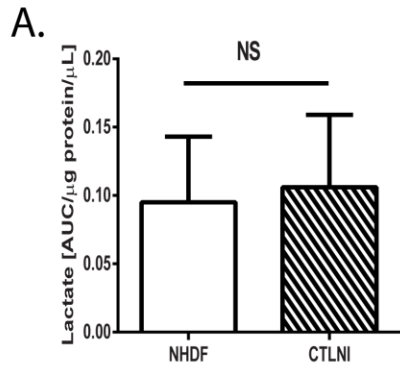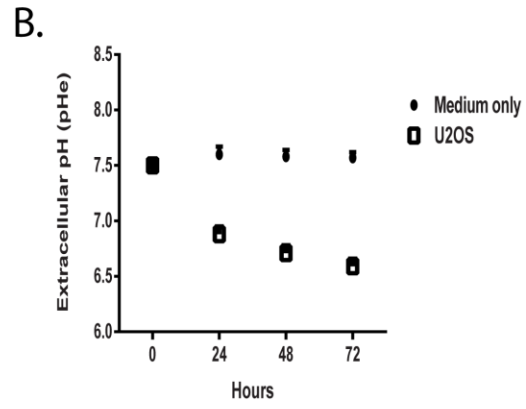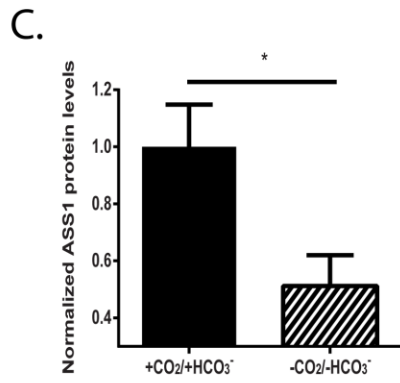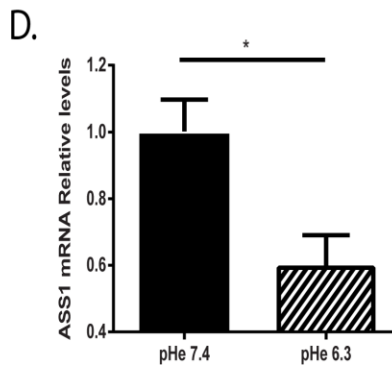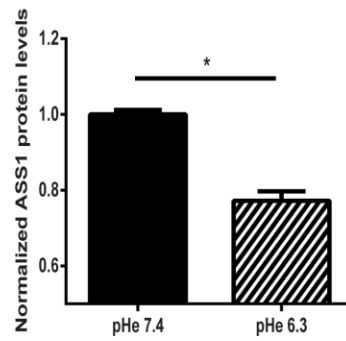

**Supplementary Figure 2. ASS1 downregulation contributes to cancer cells' survival in**

**acidic conditions.** (A) A western blot quantification showing ASS1 protein levels extracted from five different human cancers. ASS1 levels are normalized to the expression levels of GAPDH. The five different human cancers are divided into two groups based on ASS1 expression as either "High ASS1" or "Low ASS1" (B) Viability assay of five different cancer cell lines following incubation of 72 hours under either +CO<sub>2</sub>/+HCO<sub>3</sub><sup>-</sup> (control) or -CO<sub>2</sub>/-HCO<sub>3</sub><sup>-</sup> (buffer free) conditions. Viability is quantified relative to day 0. (C) Averaged pHi measurements (live confocal imaging) of five different cancer cell lines following incubation of 72 hours under either +CO<sub>2</sub>/+HCO<sub>3</sub><sup>-</sup> (control) or -CO<sub>2</sub>/-HCO<sub>3</sub><sup>-</sup> (buffer free) conditions correlating with (B). (D) A representative western blot image showing ASS1 levels in infected U2OS with empty vector vs. two different clones of *shASS1*. (E) Viability measurements of control U2OS osteosarcoma cells infected with either an empty vector or *shASS1#2* and incubated under -CO<sub>2</sub>/-HCO<sub>3</sub><sup>-</sup> conditions for 72 hours (viability is quantified relative to day 0). Unless otherwise specified, we used student's t-test (2-tail) for statistical analysis. For the multiple cell line comparisons in A, we used Two-way ANNOVA (with A-priori contrast: MNNG/HOS, LOX-IMVI vs. U2OS, MCF-7 and OVCAR-3). Unless otherwise specified, each graph represents the average of n≥3 experiments ± S.D. \*, P ≤ 0.05.

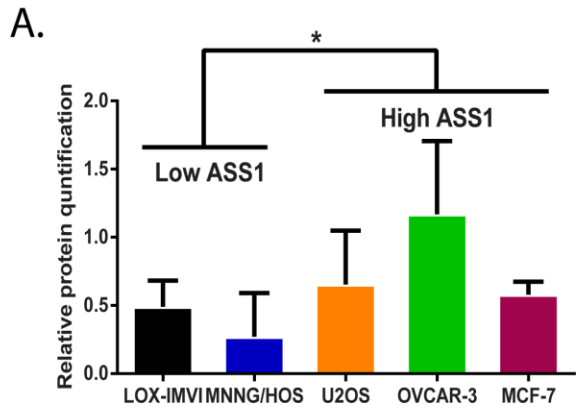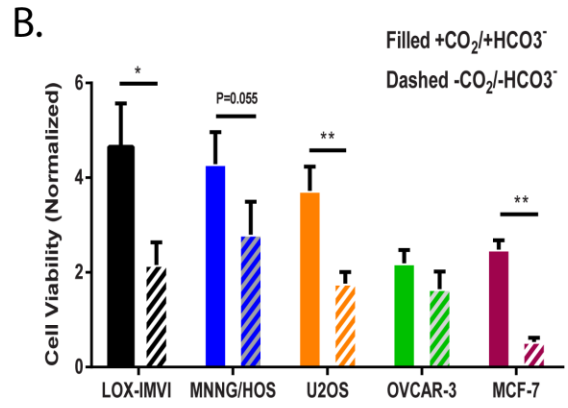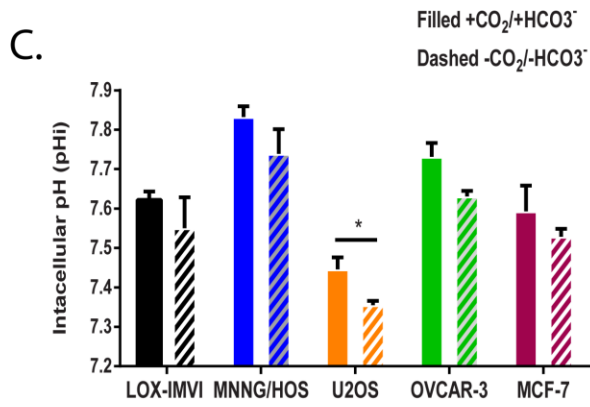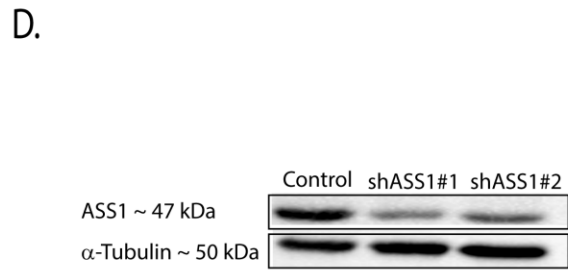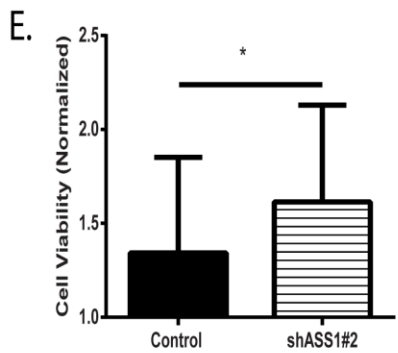

**Supplementary Figure 3. ASS1 levels are downregulated together with CAD upon HIF1 $\alpha$  activation.** (A) Pan cancer analysis of the TCGA database demonstrating that tumors with low ASS1 expression (red) levels have a higher hypoxic score, independent of HIF1 $\alpha$  target genes (Wilcoxon rank sum  $P < 7.53 \times 10^{-4}$ , see Methods). (B) Averaged western blot quantification correlating with Figure 3C, representing 3 independent experiments of proteins extracted from osteosarcoma cancer cells following 24 hours incubation under either normoxic or hypoxic conditions (1% O<sub>2</sub>). Results are presented as fold change relative to normoxia. All proteins are normalized to the expression levels of  $\alpha$ -Tubulin. (C) A representative Quantification of Real-Time PCR of cDNA produced from U2OS osteosarcoma cells showing a decrease in ASS1 and CAD mRNA expression levels following 24 hours incubation under either normoxic or hypoxic conditions (1% O<sub>2</sub>). mRNA expression levels are normalized to the mRNA levels under normoxic conditions. (D) Representative Quantification of Real-Time PCR of cDNA produced from U2OS osteosarcoma cells showing a decrease in ASS1 levels following incubation under pH 6.3 buffer solution (25 mM PIPES) as compared with pH 7.4 buffer solution (25 mM PIPES) under normoxic conditions for 24 hours. Incubation under hypoxic conditions (1% O<sub>2</sub>) and pH 6.3 buffer solution (25 mM PIPES) additively downregulates ASS1. (E) A representative immunofluorescence image of a mouse MC38 colon tumor section co-stained for ASS1 (red) and for MCT-4 (green). X6 magnification (F) A representative immunofluorescence image of a mouse Lewis Lung Carcinoma (LLC) tumor section co-stained for ASS1 (red) and MCT-4 (green). X6 magnification. (G) Kaplan-Meier plots showing that overexpression of CA9 (**left panel**), MCT4 (**middle panel**) or of both (**right panel**) in ASS1 upregulated tumors, does not associate with a significant difference in patients' survival (same number of patients as indicated in 3G), as compared to patients with cancers in which ASS1 is downregulated shown in 3G (the effect sizes are negligible:  $\Delta$ AUC = -0.001, -1E-5, and 0.04, respectively). We used student's t-test (2-tail) for statistical analysis. Unless otherwise specified, each graph represents the average of  $n \geq 3$  experiments  $\pm$  S.D. \*,  $P \leq 0.05$ .

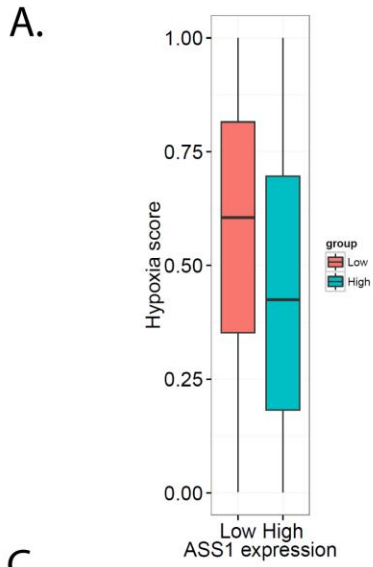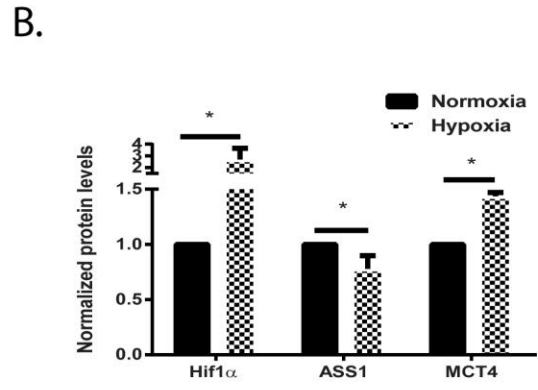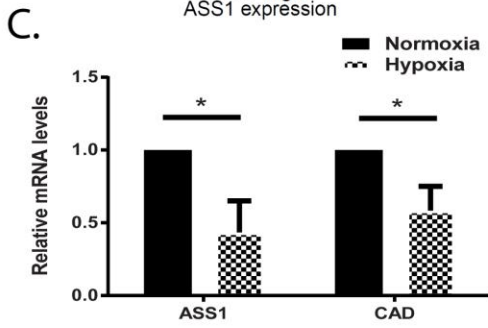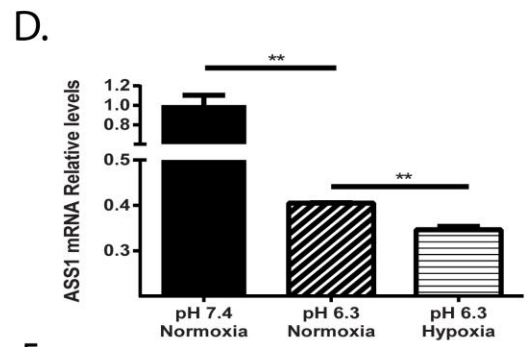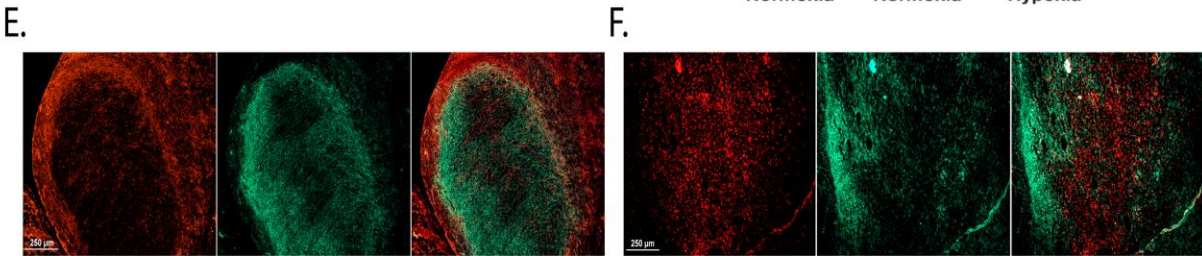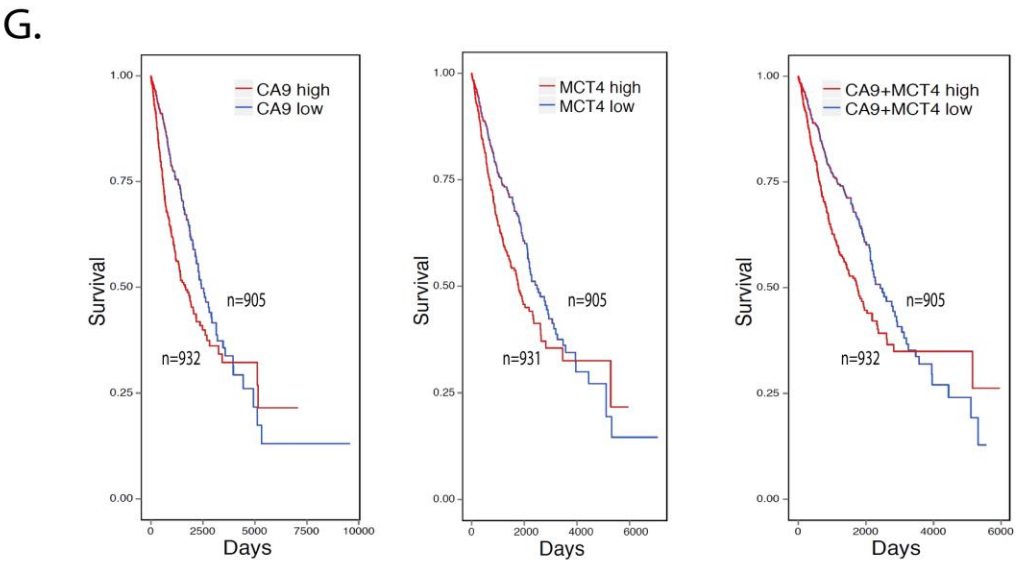

**Supplementary Figure 4. miR-224-5p downregulates ASS1 in cancer.**

(A) Target-scan analysis of the 3'UTR-ASS1 shows a conserved binding site in mammals for miR-224-5p. The image is taken from [www.targetscan.org](http://www.targetscan.org) (B) TCGA analysis of RNA expression levels shows inverse correlation between ASS1 and miR224-5p expression levels. (C) Following 48 hours of hypoxia, miR-224-5p expression levels are upregulated in U2OS cells as compared to normoxic conditions. (D) Following hypoxia for 24 hours, ASS1 mRNA levels (**Left panel**) are downregulated whereas miR-224-5p expression levels (**Right panel**) are upregulated in murine B16-F10 melanoma as compared to normoxic conditions. (E) ASS1 mRNA levels are significantly downregulated in B16-F10 melanoma cells following transfection with miR-224-5p in normoxia. Addition of anti miR-224-5p rescued ASS1 levels. Averages done on four biological replicates generated in two independent experiments. Unless otherwise specified, we used student's t-test (2-tail) for statistical analysis and each graph represents the average of  $n \geq 3$  experiments  $\pm$  S.D. \*,  $P \leq 0.05$ .

**A. Human ASS1 ENST00000352480.5 3' UTR length: 1357**

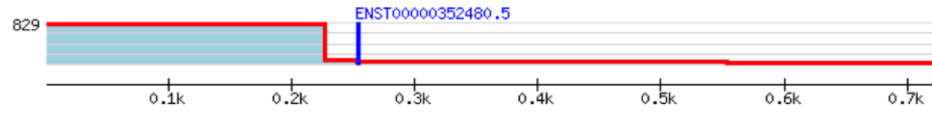

Conserved sites for miRNA families conserved among mammals

**B.**

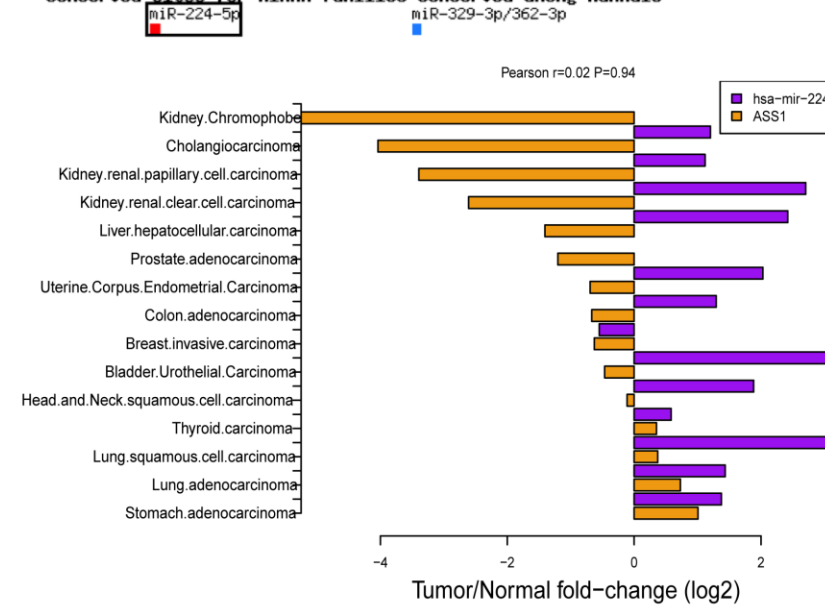

**C.**

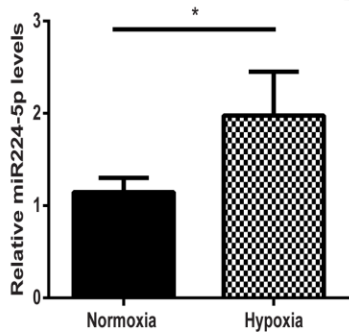

**D.**

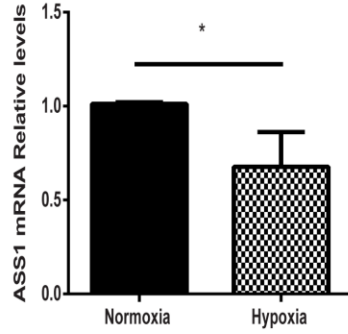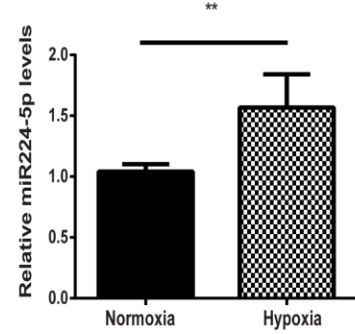

**E.**

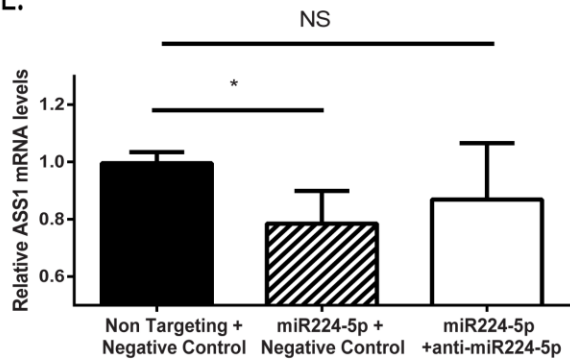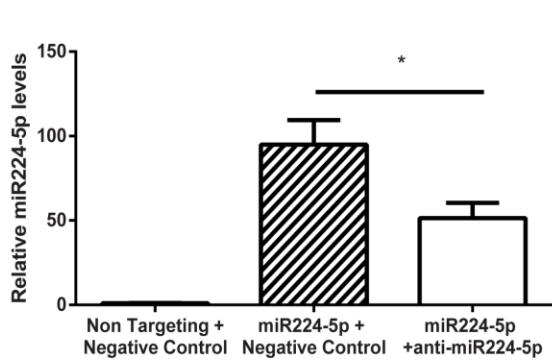



**Supplementary Figure 5. Cancer cells with low expression of ASS1 invade more and have increased sensitivity to glutamine and bi-carbonate depletion.** (A) Pan cancer analysis based on TCGA metastatic samples show that tumors with low ASS1 levels have a higher hypoxia-score, independent of HIF1 $\alpha$  target genes (Wilcoxon rank sum  $P < 0.019$ , see Methods). (B) A viability assay of five different cancer cell lines divided into two groups based on ASS1 expression as either “High ASS1” or “Low ASS1”, following incubation of 48 hours with or without glutamine, under hypoxic (1% O<sub>2</sub>) conditions. Viability is normalized to control cells grown with glutamine. (C) Normalized mRNA expression levels of control breast cancer MCF-7 cells infected with empty vector vs. two clones of *shASS1* MCF-7 cells. (D) A representative western blot image showing MCF-7 breast cancer infected with either *shGFP* or two clones of *shASS1*. (E) Viability assays using an additional *shASS1*- clone#2. Similar to our results shown in Figure 5C-D, MCF-7 breast cancer cells with ASS1 downregulation are less viable following incubation with either: 6-Diazo-5-oxo-L-norleucine (DON; 50  $\mu$ M; **left panel**) or following incubation with S0859 (100  $\mu$ M; **right panel**). Viability is normalized to non-treated cells (cells grown in the absence of inhibitors). The experiments have been performed under pH 7.4. For the multiple cell line comparisons in 4B, we used Two-way ANNOVA (with A-priori contrast: MNNG/HOS, LOX-IMVI vs. U2OS, MCF-7 and OVCAR-3). For all other comparisons, student’s t-test was used (2-tail) for statistical analysis. Unless otherwise specified, each graph represents the average of  $n \geq 3$  experiments  $\pm$  S.D. \*,  $P \leq 0.05$ ; \*\*,  $P \leq 0.01$ .

A.

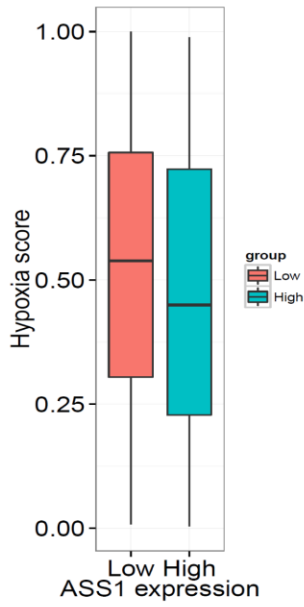

B.

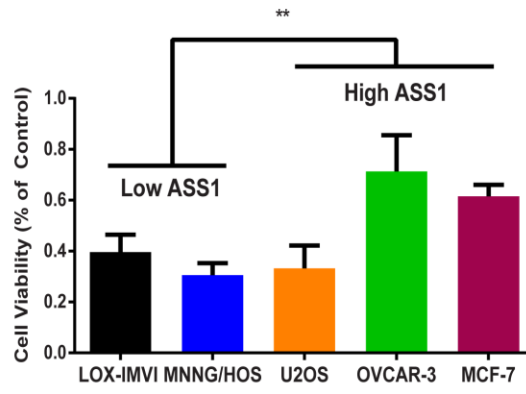

C.

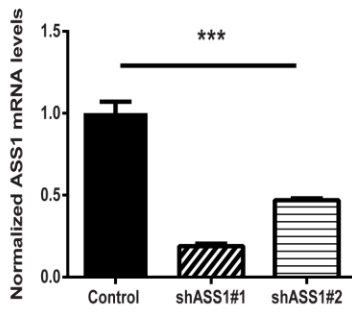

D.

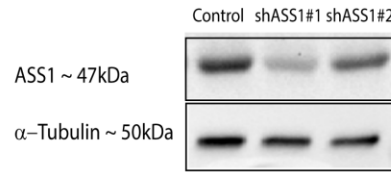

E.

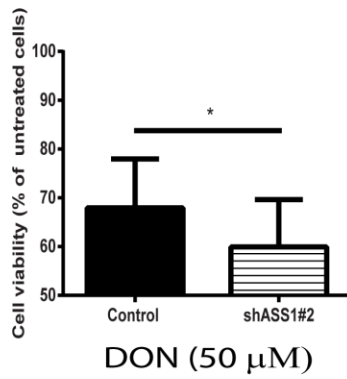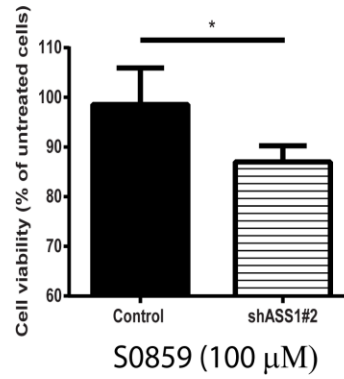

Supplement: NIHMS1517431-supplement-1.pdf [file NIHMS1517431-supplement-1.pdf]
